# Supplementary material for: Spinel/perovskite cobaltite nanocomposites synthesized by combinatorial pulsed laser deposition
Source: Royal Society of Chemistry journal article supplement (doi:10.1039/c6ce01445c), 2016-01-01
Supplement: c6ce01445c1.pdf [file c6ce01445c1.pdf]

*Supporting information for*

## **Spinel/Perovskite Cobaltite Nanocomposites Synthesized by Combinatorial Pulsed Laser Deposition**

Yan Chen<sup>†,‡,⊥</sup>, Shuchi Ojha<sup>§</sup>, Nikolai Tsvetkov<sup>†,¶</sup>, Dong Hun Kim<sup>§,||</sup>, Bilge

Yildiz<sup>\*,†,‡,§</sup>, C.A. Ross<sup>\*,§</sup>

<sup>†</sup>Laboratory of Electrochemical Interfaces, <sup>‡</sup>Department of Nuclear Science and  
Engineering, <sup>§</sup>Department of Materials Science and Engineering, Massachusetts Institute  
of Technology, Cambridge, MA02139, USA

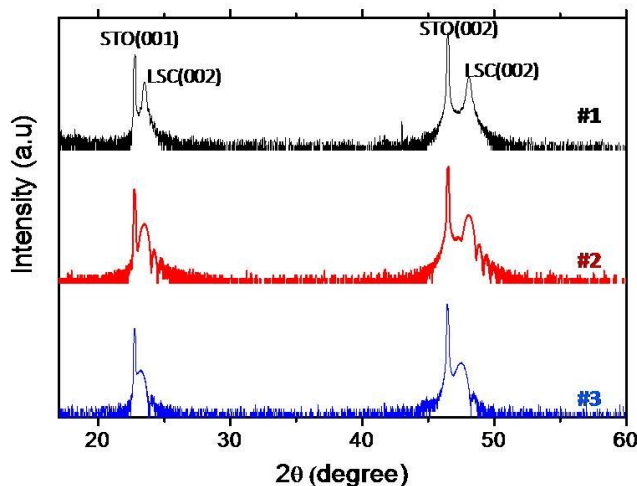

**Figure S1.** Comparison of the HRXRD 2θ-ω scans of LSC/CFO grown at 680 °C, with the fraction of CFO increasing from sample #1 to sample #3.

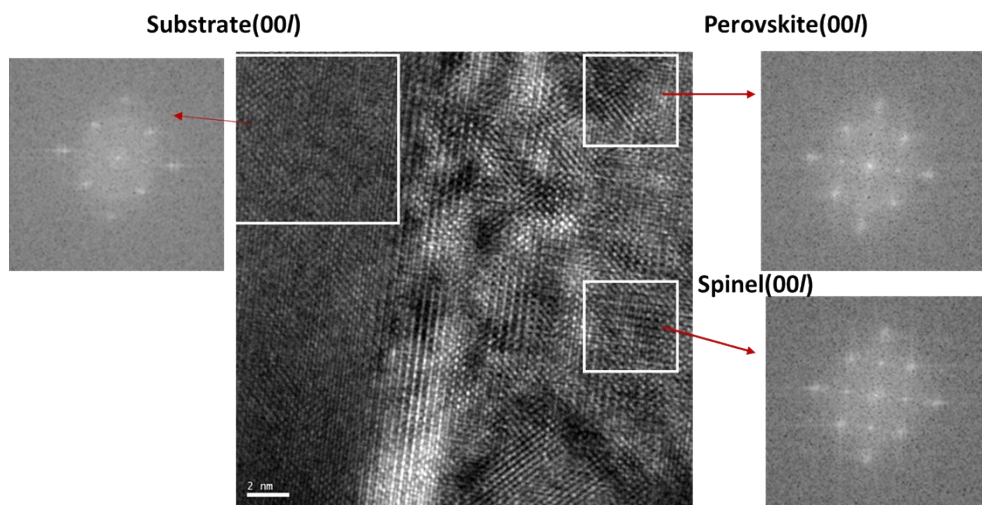

**Figure S2.** HRTEM image and corresponding Fast Fourier transform (FFT) pattern of LSC/CFO grown with 2 Hz laser frequency ( $n_1=50$ ;  $n_2=200$ ,  $N=300$ ).

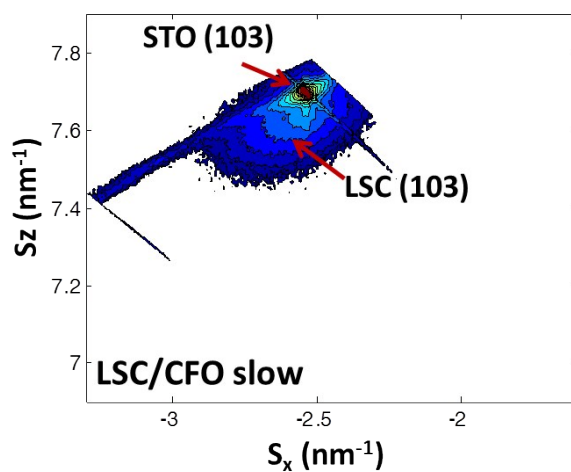

**Figure S3.** X-ray diffraction reciprocal space map of LSC/CFO on STO (100) grown at 600°C using 2 Hz laser rate

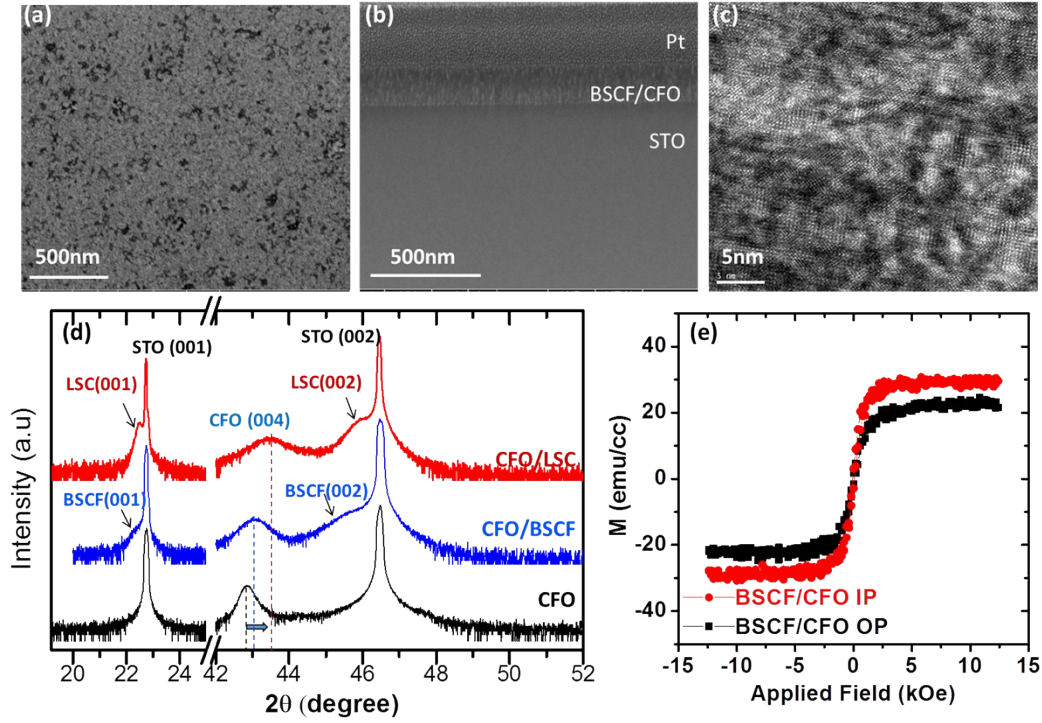

**Figure S4:** (a) Top surface and (b) cross sectional SEM image of BSCF/CFO nanocomposite structure grown at 600°C, 10 Hz,  $n_1=50$ ;  $n_2=200$ ,  $N=300$ ; (c) HRTEM image of BSCF/CFO; (d)  $2\theta$ - $\omega$  scan of LSC/CFO, BSCF/CFO nano-composite and CFO single phase films; (e) In plane (IP) and out of plane (OP) magnetization loops of BSCF/CFO nanocomposite

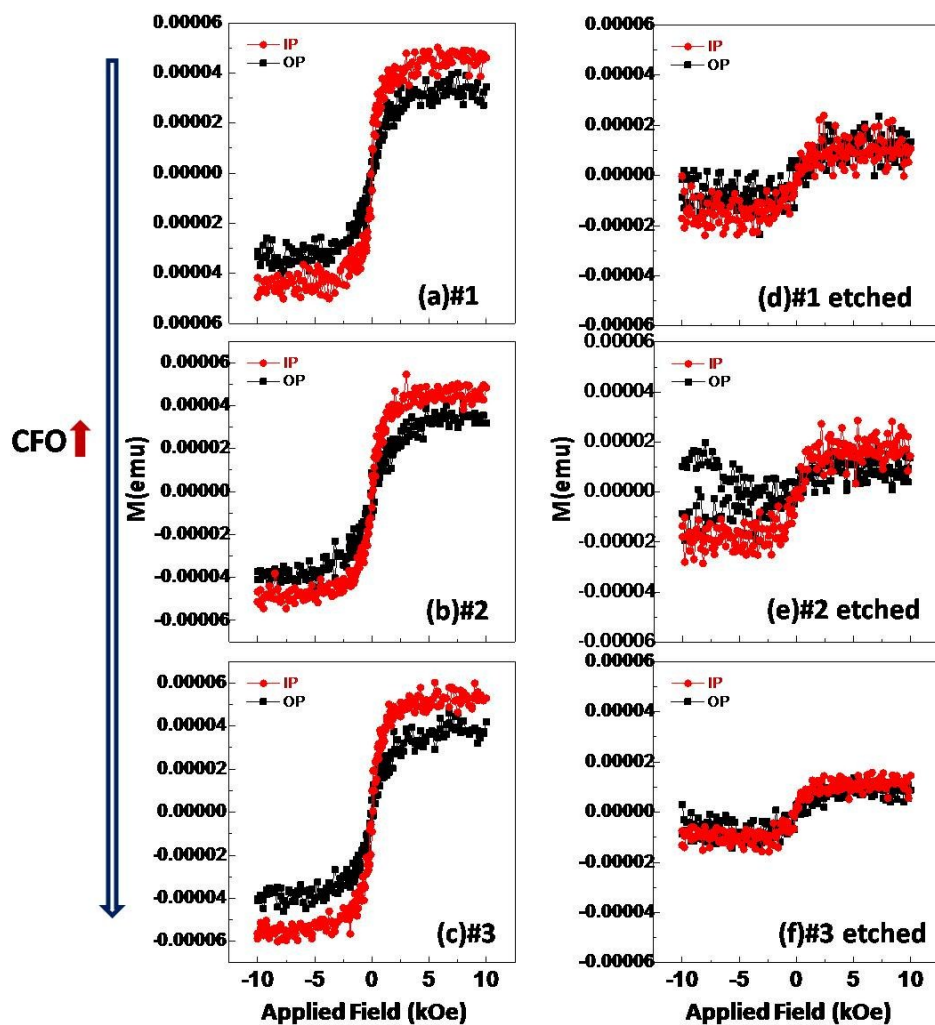

**Figure S5:** In plane (IP) and out of plane (OP) hysteresis loops of LSC/CFO nanocomposite grown at 680 °C, with the fraction of CFO increasing from sample #1 to sample #3 of Figure 2. (a-c) before and (d-f) after HCl etching.

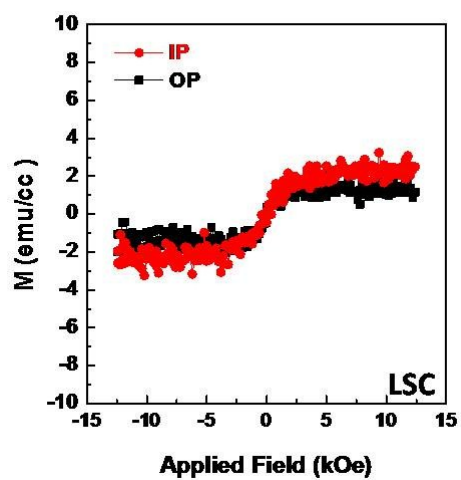

**Figure S6:** In plane (IP) and out of plane (OP) hysteresis loops of an LSC single phase film.
